# Supplementary material
Source: publisher figshare collection journal article supplement (https://gsajournals.figshare.com/ndownloader/files/21830220)
Supplement: Supplementary file 1 [file 21830220]

## Sheet: Sheet1
Table S3
Locus	Ploidy	SNPpos	Allele1	Allele2	Probe1	Probe2	Primer
Oke_uwRAD_12044	2	17	G	T	ACCTGCAGGGATTCAAAATTGTATAAAAATATAGGACAAAG	ACCTGCAGGGATTCAAAATTTTATAAAAATATAGGACAAAG	CACCTGCAGGGATTCAAAAT
Oke_uwRAD_12892	2	28	C	T	GAAAATATGTTGTGGGGTGCCGTCCTCAAACAATCACATGG	GAAAATATGTTGTGGGGTGCTGTCCTCAAACAATCACATGG	GCAGGTTGAAAATATGTTGTGG
Oke_uwRAD_13130	2	6	A	G	AGCTTTGCAGCTCCTGCAGGATTATCAAATCAAATGTATTT	AGCTTTGCAGCTCCTGCAGGGTTATCAAATCAAATGTATTT	GGAGCTTTGCAGCTCCTG
Oke_uwRAD_13498	2	17	A	G	TCCTGCAGGCCTAGTACACCATGCTTTTCTCCATGCCTTTG	TCCTGCAGGCCTAGTACACCGTGCTTTTCTCCATGCCTTTG	TCCTGCAGGCCTAGTACACC
Oke_uwRAD_15588	2	9	A	C	GACTCAGGTCCTGCAGGTAAAACACGCACACACTGGGGATT	GACTCAGGTCCTGCAGGTAACACACGCACACACTGGGGATT	GGGGAAGAGGACTCAGGTC
Oke_uwRAD_18203	2	83	A	G	CAGCCAGATACAGGATCATCACAGATACAGGGTGAGTCATG	CAGCCAGATACAGGATCATCGCAGATACAGGGTGAGTCATG	GTGCATAGACAACCCGGTCT
Oke_uwRAD_24345	2	68	A	C	TATACAGTATCTATATTGACAATTTCT[AG]TCTGCGTGAAGTC	TATACAGTATCTATATTGACCATTTCT[AG]TCTGCGTGAAGTC	AGGGGCAGAGACAGCTTATG
Oke_uwRAD_24345	2	75	A	G	TATCTATATTGAC[AC]ATTTCTATCTGCGTGAAGTC[AG]ACTGTC	TATCTATATTGAC[AC]ATTTCTGTCTGCGTGAAGTC[AG]ACTGTC	AGGGGCAGAGACAGCTTATG
Oke_uwRAD_24345	2	89	A	G	ATTGAC[AC]ATTTCT[AG]TCTGCGTGAAGTCAACTGTCAGATCCA	ATTGAC[AC]ATTTCT[AG]TCTGCGTGAAGTCGACTGTCAGATCCA	AGGGGCAGAGACAGCTTATG
Oke_uwRAD_24660	2	76	A	C	GGAAAGCTGCTCAAGTGTGGAGCTAGCTCCAGCATGAAGAA	GGAAAGCTGCTCAAGTGTGGCGCTAGCTCCAGCATGAAGAA	GTGTGTTGGAAAGCTGCTCA
Oke_uwRAD_30120	2	112	A	G	GCATTTGTAAGTAAGAAGTCAAGTATAAATGCTGCAGTAGC	GCATTTGTAAGTAAGAAGTCGAGTATAAATGCTGCAGTAGC	GAGCATTTCACTCGCATTTG
Oke_uwRAD_30653	2	51	A	G	TGGGATAGCTTAGGGCTGGGAGAACTAGATGATATACCACC	TGGGATAGCTTAGGGCTGGGGGAACTAGATGATATACCACC	TGGGTGGTGGGATAGCTTAG
Oke_uwRAD_30653	2	94	A	C	CTGGTGAGCCCTCGTCCTCCACAGCCCGGCTCACCTCTACC	CTGGTGAGCCCTCGTCCTCCCCAGCCCGGCTCACCTCTACC	TGGGTGGTGGGATAGCTTAG
Oke_uwRAD_38436	2	99	A	G	TTGCTGTGAACAACTATGTGATGCGCGTGTGGGTGTGTGCG	TTGCTGTGAACAACTATGTGGTGCGCGTGTGGGTGTGTGCG	AGCCGAAGGCCCTGTATATT
Oke_uwRAD_40088	2	43	C	T	GGCAAGCTGGTCCTGCTGGACAAACTGCTGCCTCGCCTGAA	GGCAAGCTGGTCCTGCTGGATAAACTGCTGCCTCGCCTGAA	GAGATCTGCAGGCAAGCTG
Oke_uwRAD_42178	2	79	C	T	TGTCAACAAAATGAAAGGAGCTGATCGTGGACTACAGGAGA	TGTCAACAAAATGAAAGGAGTTGATCGTGGACTACAGGAGA	GGAGTGGTGCCAGGAAAATA
Oke_uwRAD_43913	2	58	C	T	AACCTCATCAGTGTGAGGATCCATCAATCAGGCTATCAATA	AACCTCATCAGTGTGAGGATTCATCAATCAGGCTATCAATA	CCTGAGCACAACCTCATCAGT
Oke_uwRAD_4562	2	79	C	T	TTCCCGCTGTATGGGTCCCACGACACAAGACGGAGGCAGGG	TTCCCGCTGTATGGGTCCCATGACACAAGACGGAGGCAGGG	CTTGGATTTCCCGCTGTATG
Oke_uwRAD_51665	2	86	A	G	ACCTTATTCGGTTCCAAGTAAAACTGTTTTGTGTTCCAAGT	ACCTTATTCGGTTCCAAGTAGAACTGTTTTGTGTTCCAAGT	AACCCTGCCATAGGAGAACC
Oke_uwRAD_5270	2	35	G	T	AAGGTATGACAATGTAATGAGACGTACACTTTTTACATCAT	AAGGTATGACAATGTAATGATACGTACACTTTTTACATCAT	TGCAGGCTGGAGATAAAGGT
Oke_uwRAD_5270	2	83	C	T	GGTTTATCCGATCAAATAGCCTAACCTACAAAATGCGCCTA	GGTTTATCCGATCAAATAGCCTAATCTACAAAATGCGCCTA	TGCAGGCTGGAGATAAAGGT
Oke_uwRAD_53504	2	71	A	G	GGGATAGTCGCATTAGAAGGAGTGGGAGATGAGGAAATGTTGGACAGACAAT	GGGATAGTCGCATTAGAAGGGGTGGGAGATGAGGAAATGTTGGACAGACAAT	CGGGGATAGTCGCATTAGAA
Oke_uwRAD_55117	2	77	A	G	TCGTACTATAACGACAAAGGACGAGACCCAGATGCAGACAC	TCGTACTATAACGACAAAGGGCGAGACCCAGATGCAGACAC	TCAGTCATGGCCAGTTCGTA
Oke_uwRAD_55117	2	131	C	T	AGGCAGATGGTTCGAGTCTCTGATATTTATCAAAATACAAG	AGGCAGATGGTTCGAGTCTCTGATATTTATTAAAATACAAG	TCAGTCATGGCCAGTTCGTA
Oke_uwRAD_55647	2	54	A	G	AAACCCACCTCACACAGGAAACAGCACACGTTCGAATCCAG	AAACCCACCTCACACAGGAAGCAGCACACGTTCGAATCCAG	AAACCCACCTCACACAGGAA
Oke_uwRAD_57860	2	30	A	C	TGTAGTCTTGCTGAGGACTTATCTGTTGCTGATAAGCATTT	TGTAGTCTTGCTGAGGACTTCTCTGTTGCTGATAAGCATTT	TGCAGGAATTTGTAGTCTTGCT
Oke_uwRAD_57860	2	98	A	G	TGAGTAAATTGAGGCGAATATATTGATAAAACTCACCTTAT	TGAGTAAATTGAGGCGAATATATTGATAAAACTCACCTTGT	TGCAGGAATTTGTAGTCTTGCT
Oke_uwRAD_58999	2	57	C	T	TGGCTGTTCGTCTGTGTCCCCGTCTCTTCCTCTCCTCTCCT	TGGCTGTTCGTCTGTGTCCCTGTCTCTTCCTCTCCTCTCCT	GAAGTGGCTGTTCGTCTGTG
Oke_uwRAD_59830	2	79	G	C	GTTTGAGCAAAAGAACGCAGGATTATAATTGCAGGAAACGA	GTTTGAGCAAAAGAACGCAGCATTATAATTGCAGGAAACGA	TTATTATGTTTGAGCAAAAGAACG
Oke_uwRAD_59925	2	78	A	C	GCCAGCAGCATGGGTTTAGCATCCACATCAACTCGGCCGGG	GCCAGCAGCATGGGTTTAGCCTCCACATCAACTCGGCCGGG	TGTGAAGGGTTAGCATGCAG
Oke_uwRAD_63535	2	73	G	T	TTCAGCCCCATCACACCAATGACCTTTTCCCGCACATACTG	TTCAGCCCCATCACACCAATTACCTTTTCCCGCACATACTG	ATTTTCCAGTGGGTTTCAGC
Oke_uwRAD_649	2	16	C	T	ACCCTGCAGGTGCTCAAAGTCAA[AC]CCTTCAGCACCTCGCCT	ACCCTGCAGGTGCTCAAAGTTAA[AC]CCTTCAGCACCTCGCCT	CTACCCTGCAGGTGCTCAA
Oke_uwRAD_649	2	19	A	C	CTGCAGGTGCTCAAAGT[CT]AAACCTTCAGCACCTCGCCTCTC	CTGCAGGTGCTCAAAGT[CT]AACCCTTCAGCACCTCGCCTCTC	CTACCCTGCAGGTGCTCAA
Oke_uwRAD_66755	2	62	A	C	AGATGTGAATGTAACATATTATTTGAACTGTTGGGGGCCAG	AGATGTGAATGTAACATATTCTTTGAACTGTTGGGGGCCAG	TCACAATCCATCTTCCTCTGTG
Oke_uwRAD_66755	2	85	A	G	TGAACTGTTGGGGGCCAGAAACCCACATAACACTGTCATAA	TGAACTGTTGGGGGCCAGAAGCCCACATAACACTGTCATAA	TCACAATCCATCTTCCTCTGTG
Oke_uwRAD_71183	2	102	A	G	GAGCTGTAAGAAGAACGAGAAAGCGA[AG]AGATCCTGCCAGAG	GAGCTGTAAGAAGAACGAGAGAGCGA[AG]AGATCCTGCCAGAG	GGGCAGGAGCTGTAAGAAGA
Oke_uwRAD_71183	2	108	A	G	TAAGAAGAACGAGA[AG]AGCGAAAGATCCTGCCAGAGCATAGC	TAAGAAGAACGAGA[AG]AGCGAGAGATCCTGCCAGAGCATAGC	GGGCAGGAGCTGTAAGAAGA
Oke_uwRAD_71270	2	74	A	G	TTGGGTGATGAGGAGAGGCTACAGCCCAAGGTGAGAAGCGA	TTGGGTGATGAGGAGAGGCTGCAGCCCAAGGTGAGAAGCGA	TCTTGGGTGATGAGGAGAGG
Oke_uwRAD_79615	2	44	G	T	TCATCATCTCTGTTGCAAATGAGACAGAAGGAATGTTTTCC	TCATCATCTCTGTTGCAAATTAGACAGAAGGAATGTTTTCC	GCAGGACATCTCTCCTGATAGC
Oke_uwRAD_79615	2	78	C	T	GTTTTCCCCTCCTCCAGCACCAGGGATATAAAGCCTAGATA	GTTTTCCCCTCCTCCAGCACTAGGGATATAAAGCCTAGATA	GCAGGACATCTCTCCTGATAGC
Oke_uwRAD_80599	2	25	C	T	GCCACACTCGTTCTGGCCACCGTCAGTAGAAGCTCCTGCCA	GCCACACTCGTTCTGGCCACTGTCAGTAGAAGCTCCTGCCA	GCAGGCCACACTCGTTCT
Oke_uwRAD_85377	2	98	A	C	ATCACTAAGAAGTGTGTTTTATGTTCTTCTTTGACCTGATG	ATCACTAAGAAGTGTGTTTTATGTTCTTCTTTGACCTGCTG	GCAGGTTATAGCCCAGATTCC
Oke_uwRAD_85509	2	52	A	C	GATCCTGAAACTTGACCCCCAAAAAAACATCTGGGTTTAGA	GATCCTGAAACTTGACCCCCCAAAAAACATCTGGGTTTAGA	GCAGTCTGAGTCCGATGTGA
Oke_uwRAD_8693	2	123	A	G	ACACTCTTATTAGAGGGATGAAGAAAAGGAGGGAGAGAGGG	ACACTCTTATTAGAGGGATGGAGAAAAGGAGGGAGAGAGGG	TCTCCAGGTCCCACACTCTT
Oke_uwRAD_91458	2	68	A	T	CACTGAGAATGGCAAAAATAAAAAGTTTGACCAGCTCTTGC	CACTGAGAATGGCAAAAATATAAAGTTTGACCAGCTCTTGC	CTGCACTGAGAATGGCAAAA
Information used for genotyping with Gtscore. The ploidy columns specifies what ploidy level to genotype, in this case all loci were diploid. The SNP pos column is the position of the target SNP from the original RADseq data. The Allele1 and Allele2 columns list the alleles that correspond to probe1 and probe2. The probe1 and probe2 sequences were used to identify which allele was present for seq…
